# Supplementary material for: Genome-wide analyses of the bHLH gene family reveals structural and functional characteristics in the aquatic plant Nelumbo nucifera
Source: PeerJ. 2019 Jun 14;7:e7153. doi: 10.7717/peerj.7153 (PMC6573809; doi:10.7717/peerj.7153)
Supplement: Supplemental Information 3 [file peerj-07-7153-s003.xls]

## Sheet: Sheet1
Table S1. Detailed characteristics of NnbHLHs in lotus.
Database ID	Gene ID	Location	Start position (bp)	End position (bp)	Protein length (aa)	Molecular weight (kDa)	Isoelectric point (pI)	Asp + Glu	Arg + Lys	(GRAVY)
NNU_16507	NnbHLH1	megascaffold_1	42807882	42811092	468	51.4241	5.53	45	38	-0.62
NNU_02391	NnbHLH2	megascaffold_4	36343310	36354352	408	46.6887	8.67	59	64	-0.4
NNU_11127	NnbHLH3	megascaffold_1	85512386	85513524	181	20.6377	9.33	21	25	-0.513
NNU_25984	NnbHLH4	megascaffold_1	181546862	181547908	162	18.4783	6.25	23	19	-0.296
NNU_03911	NnbHLH5	megascaffold_5	40440555	40442072	342	37.8198	6.04	45	41	-0.505
NNU_12125	NnbHLH6	megascaffold_3	38775974	38779780	505	53.1489	6.05	43	36	-0.505
NNU_19315	NnbHLH7	megascaffold_2	82268003	82271361	507	53.3562	6.18	42	37	-0.569
NNU_13078	NnbHLH8	megascaffold_3	63471150	63472942	277	30.9145	8.13	33	35	-0.339
NNU_12638	NnbHLH9	megascaffold_3	11624839	11626182	272	30.0603	7.63	30	31	-0.317
NNU_00271	NnbHLH10	megascaffold_1	13995897	13998337	263	28.3931	8.83	31	35	-0.357
NNU_11947	NnbHLH11	megascaffold_2	102956363	102958337	472	53.6497	8.82	53	57	-0.648
NNU_20930	NnbHLH12	megascaffold_2	127025809	127029130	503	56.948	9.22	52	62	-0.42
NNU_06776	NnbHLH13	megascaffold_13	6299274	6306919	681	76.8325	5.69	99	83	-0.748
NNU_08503	NnbHLH14	megascaffold_1	173268744	173272135	261	28.6647	8.77	33	37	-0.344
NNU_07829	NnbHLH15	megascaffold_5	19858824	19863604	619	68.0031	5.78	82	72	-0.477
NNU_07223	NnbHLH16	megascaffold_4	31504366	31507071	619	69.1665	6.26	84	78	-0.585
NNU_24564	NnbHLH17	megascaffold_15	12990300	12991886	528	58.5207	6.46	71	68	-0.56
NNU_08469	NnbHLH18	megascaffold_1	246893704	246896088	507	56.9156	5.48	68	49	-0.621
NNU_10969	NnbHLH19	megascaffold_24	1249362	1251141	518	58.1867	5.04	71	47	-0.654
NNU_16779	NnbHLH20	megascaffold_1	73206634	73208477	424	47.5478	5.46	55	45	-0.521
NNU_06917	NnbHLH21	megascaffold_13	10047235	10047943	207	22.9005	6.54	30	29	-0.094
NNU_16845	NnbHLH22	megascaffold_2	129549323	129550684	453	48.8694	5.22	56	45	-0.493
NNU_04197	NnbHLH23	megascaffold_2	100195033	100196759	454	49.8317	5.66	56	49	-0.562
NNU_13550	NnbHLH24	megascaffold_6	37053542	37054315	257	27.9572	8.93	24	27	-0.266
NNU_16319	NnbHLH25	megascaffold_2	13042402	13051161	690	76.6946	5.44	96	76	-0.459
NNU_08684	NnbHLH26	megascaffold_8	35969919	35976960	664	74.1976	5.09	99	72	-0.468
NNU_06172	NnbHLH27	megascaffold_1	241948611	241954003	702	78.8317	5.26	104	79	-0.721
NNU_17082	NnbHLH28	megascaffold_1	157223077	157223847	256	28.1172	6.53	24	23	-0.309
NNU_08906	NnbHLH29	megascaffold_1	194361862	194364275	485	53.5646	6.42	46	44	-0.549
NNU_18906	NnbHLH30	megascaffold_3	12813074	12813922	159	17.4581	9.94	12	21	-0.426
NNU_00062	NnbHLH31	megascaffold_10	25468588	25482729	353	37.4767	8.78	33	38	-0.475
NNU_02851	NnbHLH32	megascaffold_12	6915804	6919611	467	50.4462	8.12	46	48	-0.682
NNU_11564	NnbHLH33	megascaffold_2	59593083	59597616	463	50.5142	8.81	45	50	-0.726
NNU_15371	NnbHLH34	megascaffold_43	741498	745264	598	64.5468	6.52	64	61	-0.681
NNU_20980	NnbHLH35	megascaffold_59	341332	344761	605	64.9991	6.31	64	60	-0.675
NNU_04384	NnbHLH36	megascaffold_5	27740887	27744606	549	59.2182	6.09	61	54	-0.604
NNU_01940	NnbHLH37	megascaffold_4	44229795	44234129	548	59.2023	5.04	70	53	-0.435
NNU_22283	NnbHLH38	megascaffold_5	2991718	2997026	552	59.6537	5.26	69	54	-0.495
NNU_05251	NnbHLH39	megascaffold_6	28968956	28971088	342	38.5366	4.72	56	39	-0.5
NNU_19747	NnbHLH40	megascaffold_7	4617593	4619909	255	28.8337	9.16	29	35	-0.59
NNU_10102	NnbHLH41	megascaffold_6	183863	186112	305	34.0364	5.79	43	38	-0.459
NNU_16459	NnbHLH42	megascaffold_1	41705035	41710912	237	26.0446	8.44	30	32	-0.597
NNU_03457	NnbHLH43	megascaffold_1	227621928	227634767	215	24.3768	7.58	31	32	-0.705
NNU_10476	NnbHLH44	megascaffold_1	65008915	65010717	496	55.1289	5.33	75	50	-0.74
NNU_02366	NnbHLH45	megascaffold_4	36909894	36912184	352	40.1864	6.47	47	44	-0.684
NNU_01457	NnbHLH46	megascaffold_1	251528070	251531774	350	37.9838	5.43	43	35	-0.44
NNU_02480	NnbHLH47	megascaffold_4	1933911	1936363	357	38.5493	5.42	42	35	-0.424
NNU_06148	NnbHLH48	megascaffold_1	242381190	242381760	164	18.4017	9.68	15	24	-0.059
NNU_17060	NnbHLH49	megascaffold_1	157646366	157652557	299	32.839	7.15	30	30	-0.563
NNU_11720	NnbHLH50	megascaffold_2	107094678	107100738	548	58.9872	5.3	61	47	-0.443
NNU_16514	NnbHLH51	megascaffold_1	233551627	233558145	291	30.8336	5.92	34	30	-0.373
NNU_15332	NnbHLH52	megascaffold_8	12923634	12926615	308	35.1909	8.41	35	37	-0.482
NNU_13322	NnbHLH53	megascaffold_6	32832982	32834527	329	36.2136	5.63	40	34	-0.453
NNU_22650	NnbHLH54	megascaffold_1	138932572	138934595	326	36.1398	5.58	40	35	-0.391
NNU_17174	NnbHLH55	megascaffold_1	155008999	155012688	478	52.9562	6.63	53	52	-0.726
NNU_07517	NnbHLH56	megascaffold_4	25756661	25761498	542	58.2608	5.53	63	51	-0.621
NNU_04402	NnbHLH57	megascaffold_5	27321974	27327204	345	38.0134	5.12	46	35	-0.663
NNU_21285	NnbHLH58	megascaffold_144	67724	72363	432	48.0151	6.06	47	44	-0.662
NNU_13590	NnbHLH59	megascaffold_6	37925539	37932852	380	40.8214	6.18	37	32	-0.539
NNU_17059	NnbHLH60	megascaffold_1	157662422	157669809	437	47.6352	6.09	47	42	-0.606
NNU_09221	NnbHLH61	megascaffold_9	21571923	21599258	779	82.6426	6.16	77	69	-0.335
NNU_17740	NnbHLH62	megascaffold_4	7721283	7723799	428	48.027	6.04	57	49	-0.614
NNU_01562	NnbHLH63	megascaffold_1	131504087	131506448	341	38.5757	4.8	56	39	-0.5
NNU_08129	NnbHLH64	megascaffold_6	18572124	18573831	360	39.7458	7.78	41	42	-0.436
NNU_01083	NnbHLH65	megascaffold_11	14503678	14512563	213	24.0089	6.13	34	32	-0.887
NNU_21081	NnbHLH66	megascaffold_2	8480065	8482041	658	72.499	5.55	83	72	-0.594
NNU_25655	NnbHLH67	megascaffold_2	118101916	118105382	445	48.5594	5.65	51	42	-0.6
NNU_07616	NnbHLH68	megascaffold_4	23853664	23856858	350	38.8629	6.2	45	40	-0.595
NNU_00581	NnbHLH69	megascaffold_5	30903479	30906788	341	37.7547	6.23	43	39	-0.572
NNU_15627	NnbHLH70	megascaffold_7	13371294	13373259	236	26.1487	8.42	33	35	-0.472
NNU_26126	NnbHLH71	megascaffold_2	96486657	96490378	343	37.8781	6.08	35	31	-0.694
NNU_06585	NnbHLH72	megascaffold_13	1299339	1302925	209	23.1826	9.11	24	32	-0.521
NNU_14943	NnbHLH73	megascaffold_1	214767051	214787246	545	59.4126	5.61	66	55	-0.617
NNU_24098	NnbHLH74	megascaffold_8	14850147	14852147	598	66.3241	6.6	71	69	-0.592
NNU_14269	NnbHLH75	megascaffold_17	4981545	4982861	240	27.7043	8.3	35	37	-0.735
NNU_16716	NnbHLH76	megascaffold_1	70404272	70407808	288	31.9943	9.38	26	35	-0.5
NNU_14291	NnbHLH77	megascaffold_17	4421197	4429467	324	34.4727	6.01	37	32	-0.408
NNU_07153	NnbHLH78	megascaffold_4	32959924	32964214	284	30.6809	5.59	38	34	-0.73
NNU_25084	NnbHLH79	megascaffold_5	17494775	17497885	300	32.4496	5.39	41	34	-0.728
NNU_07286	NnbHLH80	megascaffold_4	29946595	29951527	290	31.5879	6.25	37	35	-0.807
NNU_18017	NnbHLH81	megascaffold_10	35662866	35666357	252	28.8315	5.28	42	35	-0.512
NNU_16952	NnbHLH82	megascaffold_2	131465844	131467194	322	36.1625	5.13	46	36	-0.465
NNU_16957	NnbHLH83	megascaffold_2	131707000	131708517	327	36.5027	4.81	49	33	-0.458
NNU_21071	NnbHLH84	megascaffold_2	8842172	8845521	315	35.8488	8.77	35	39	-0.459
NNU_01959	NnbHLH85	megascaffold_4	44004859	44007395	366	40.3903	6.96	44	44	-0.64
NNU_22271	NnbHLH86	megascaffold_5	3304767	3307378	410	46.3255	8.85	53	62	-0.691
NNU_08265	NnbHLH87	megascaffold_33	769288	774342	752	80.5433	6.66	75	72	-0.562
NNU_18582	NnbHLH88	megascaffold_3	19703425	19704611	306	34.8474	5.33	37	28	-0.472
NNU_03866	NnbHLH89	megascaffold_1	111575907	111578406	440	49.0135	5.21	59	44	-0.469
NNU_01718	NnbHLH90	megascaffold_6	7034258	7034983	241	26.4949	6.3	26	23	-0.5
NNU_13824	NnbHLH91	megascaffold_6	42575941	42580369	461	50.861	6.38	49	46	-0.537
NNU_05163	NnbHLH92	megascaffold_6	30662225	30664607	235	25.7894	9.65	28	39	-0.602
NNU_18059	NnbHLH93	megascaffold_8	3256644	3258212	522	58.1019	8.21	66	68	-0.434
NNU_14485	NnbHLH94	megascaffold_2	24077176	24080795	491	53.6173	6.77	53	52	-0.64
NNU_18308	NnbHLH95	megascaffold_8	26207293	26210868	456	49.8833	6.61	49	47	-0.623
NNU_18583	NnbHLH96	megascaffold_3	19687159	19688039	139	15.6962	9.21	16	20	-0.446
NNU_00463	NnbHLH97	megascaffold_5	33730652	33733446	278	30.7361	5.15	35	27	-0.589
NNU_07710	NnbHLH98	megascaffold_4	21629985	21632739	275	30.1228	5.39	33	27	-0.403
NNU_03565	NnbHLH99	megascaffold_8	48746132	48748826	274	30.4197	9.21	28	38	-0.484
NNU_09588	NnbHLH100	megascaffold_10	16968224	16969766	250	27.4806	5.3	30	24	-0.544
NNU_10412	NnbHLH101	megascaffold_1	62755664	62762222	702	79.2293	5.48	94	70	-0.36
NNU_21409	NnbHLH102	megascaffold_3	24625584	24629171	319	35.101	5.19	35	25	-0.626
NNU_11558	NnbHLH103	megascaffold_2	59268365	59273294	405	44.9354	5.44	54	47	-0.529
NNU_04965	NnbHLH104	megascaffold_8	1384234	1386676	397	45.3132	5.89	62	52	-0.725
NNU_12833	NnbHLH105	megascaffold_1	136373140	136373918	234	26.0115	8.71	33	37	-0.628
NNU_26108	NnbHLH106	megascaffold_2	96735902	96738931	385	43.5049	4.94	59	42	-0.626
NNU_06794	NnbHLH107	megascaffold_13	6665827	6671944	330	36.2339	6.22	37	33	-0.449
NNU_26107	NnbHLH108	megascaffold_2	96754078	96758534	397	44.9896	4.87	63	43	-0.624
NNU_05349	NnbHLH109	megascaffold_6	27134017	27137582	444	49.3742	5.41	51	41	-0.655
NNU_14983	NnbHLH110	megascaffold_3	74734238	74734580	89	10.0746	10.62	7	18	-0.758
NNU_10417	NnbHLH111	megascaffold_1	62834994	62848247	410	45.3067	5.07	53	44	-0.353
NNU_15257	NnbHLH112	megascaffold_12	2869810	2870970	224	24.6478	8.87	30	34	-0.546
NNU_15580	NnbHLH113	scaffold_634	17443	19806	211	23.0626	6.31	29	27	-0.609
NNU_20832	NnbHLH114	scaffold_554	33814	34743	229	25.3465	8.6	32	35	-0.596
NNU_15261	NnbHLH115	megascaffold_12	2920646	2921848	227	25.3168	9.27	29	35	-0.475
